# Supplementary material
Source: ML conference proceedings conference paper supplement (https://openaccess.thecvf.com/content/CVPR2024/html/He_Video-Based_Human_Pose_CVPR_2024_paper.html)
Supplement: Supplementary file 2 [file He_Video-Based_Human_Pose_CVPR_2024_supplemental.zip]

Archive with 2 entries (2 files):
- appendix-document.pdf
- video.mp4
